# Supplementary material for: Xylapeptide A, an Antibacterial Cyclopentapeptide with an Uncommon L-Pipecolinic Acid Moiety from the Associated Fungus Xylaria sp. (GDG-102)
Source: PubMed Central journal article supplement (PMC5537251; doi:10.1038/s41598-017-07331-4), 2017-07-31
Supplement: 41598_2017_7331_MOESM1_ESM.pdf [file 41598_2017_7331_MOESM1_ESM.pdf]

# **Xylapeptide A, an Antibacterial Cyclopentapeptide with an Uncommon *L*-Pipicolinic Acid Moiety from the Associated Fungus *Xylaria* sp. (GDG-102)**

Wei-Feng Xu,<sup>†,‡,¶</sup> Xue-Mei Hou,<sup>‡,§,¶</sup> Fei-Hua Yao,<sup>†</sup> Na Zheng,<sup>†</sup> Jun Li,<sup>†</sup> Chang-Yun Wang,<sup>‡,§</sup> Rui-Yun Yang<sup>\*,†</sup> and Chang-Lun Shao<sup>\*,‡,§</sup>

<sup>†</sup>State Key Laboratory for the Chemistry and Molecular Engineering of Medicinal Resources, College of Chemistry and Pharmaceutical Sciences, Guangxi Normal University, Guilin 541004, The People's Republic of China

<sup>‡</sup>Key Laboratory of Marine Drugs, The Ministry of Education of China, School of Medicine and Pharmacy, Ocean University of China, Qingdao 266003, The People's Republic of China

<sup>§</sup>Laboratory for Marine Drugs and Bioproducts, Qingdao National Laboratory for Marine Science and Technology, Qingdao 266200, The People's Republic of China

<sup>¶</sup> These authors contributed equally to this work

\* To whom correspondence should be addressed. Tel/Fax: +86-773-2120-958 (R.-Y.Y.); +86-532-8203-1503 (C.-L.S.). E-mails: yang\_rui\_yun@163.com (R.-Y.Y.); shaochenglun@163.com (C.-L.S.).

## List of Supporting Information

**Figure S1.**  $^1\text{H}$  NMR spectra of the organic extracts, and xylapeptides A and B in  $\text{CDCl}_3$ .

**Figure S2.**  $^1\text{H}$  NMR (500 MHz,  $\text{CDCl}_3$ ) spectrum of compound **1**.

**Figure S3.**  $^{13}\text{C}$  NMR (125 MHz,  $\text{CDCl}_3$ ) spectrum of compound **1**.

**Figure S4.**  $^1\text{H}$ - $^1\text{H}$  COSY ( $\text{CDCl}_3$ ) spectrum of compound **1**.

**Figure S5.** HSQC ( $\text{CDCl}_3$ ) spectrum of compound **1**.

**Figure S6.** HMBC ( $\text{CDCl}_3$ ) spectrum of compound **1**.

**Figure S7.** HRESIMS spectrum of compound **1**.

**Figure S8.** ESI  $\text{MS}^2$  spectrum of compound **1**.

**Figure S9.**  $^1\text{H}$  NMR (400 MHz,  $\text{CDCl}_3$ ) spectrum of compound **2**.

**Figure S10.**  $^{13}\text{C}$  NMR (100 MHz,  $\text{CDCl}_3$ ) spectrum of compound **2**.

**Figure S11.**  $^1\text{H}$ - $^1\text{H}$  COSY ( $\text{CDCl}_3$ ) spectrum of compound **2**.

**Figure S12.** HSQC ( $\text{CDCl}_3$ ) spectrum of compound **2**.

**Figure S13.** HMBC ( $\text{CDCl}_3$ ) spectrum of compound **2**.

**Figure S14.** HRESIMS spectrum of compound **2**.

**Figure S15.** ESI  $\text{MS}^2$  spectrum of compound **2**.

**Figure S16.** Assignments of ESI  $\text{MS}^2$  fragmentation data for **1** and **2**.

**Figure S17.** Marfey's analysis of the amino acids in **1** and **2** on UPLC-MS.

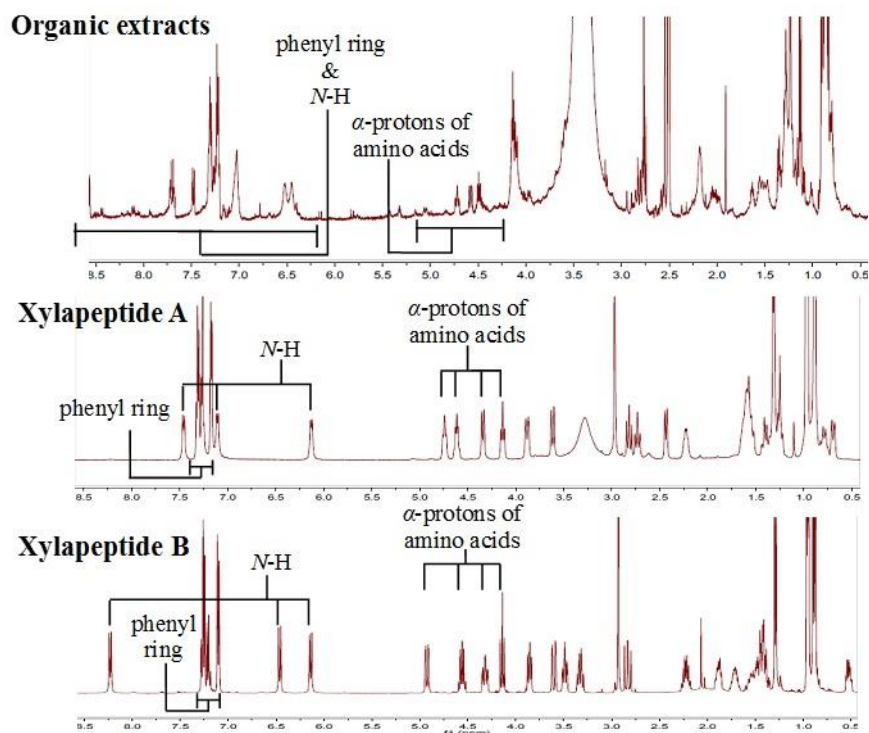

**Figure S1.**  $^1\text{H}$  NMR spectra of the organic extracts, and xylapeptides A and B in  $\text{CDCl}_3$ .

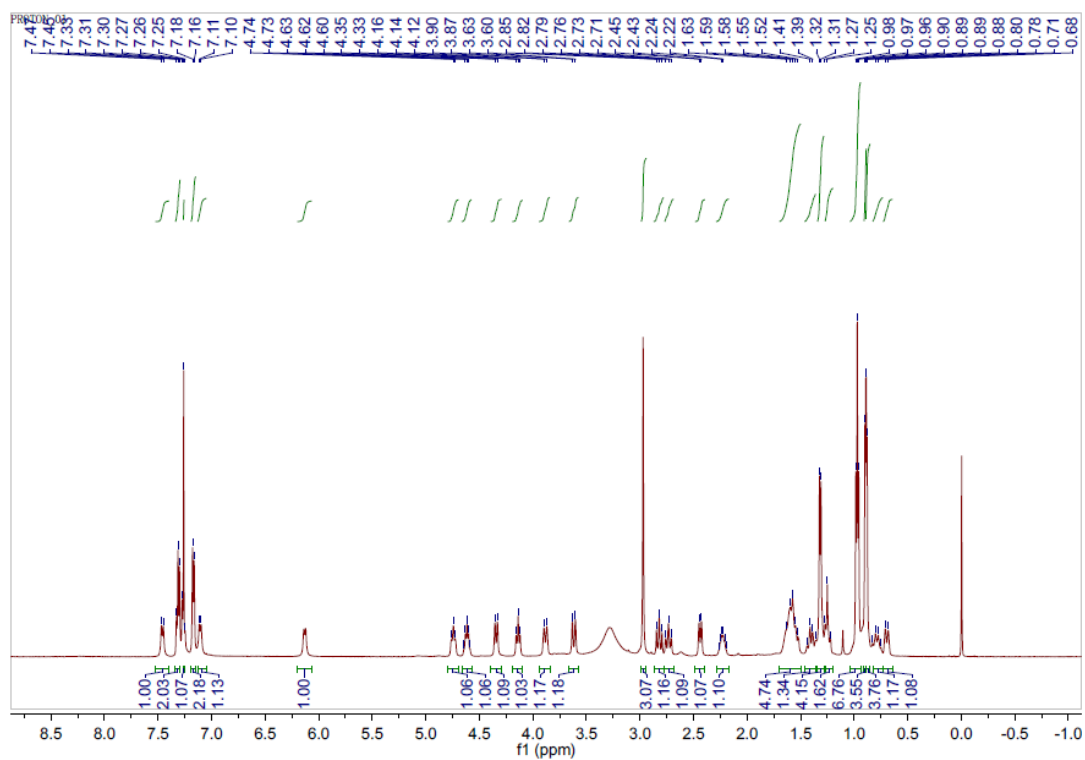

**Figure S2.**  $^1\text{H}$  NMR (500 MHz,  $\text{CDCl}_3$ ) spectrum of compound **1**.

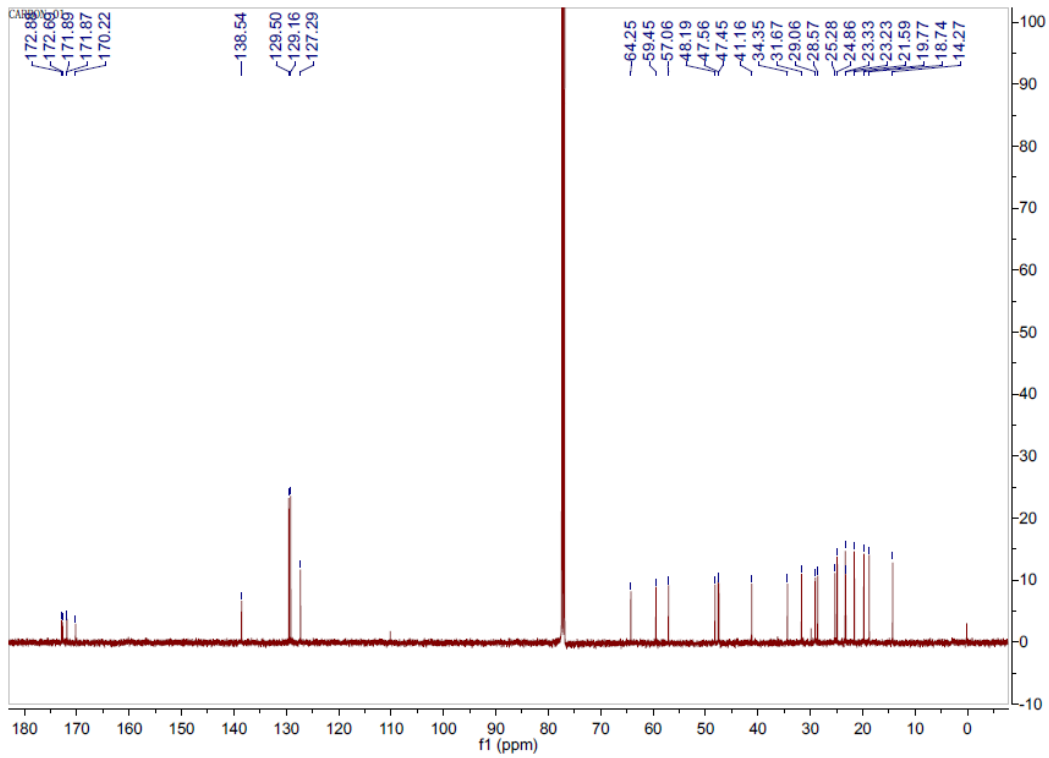

**Figure S3.**  $^{13}\text{C}$  NMR (125 MHz,  $\text{CDCl}_3$ ) spectrum of compound **1**.

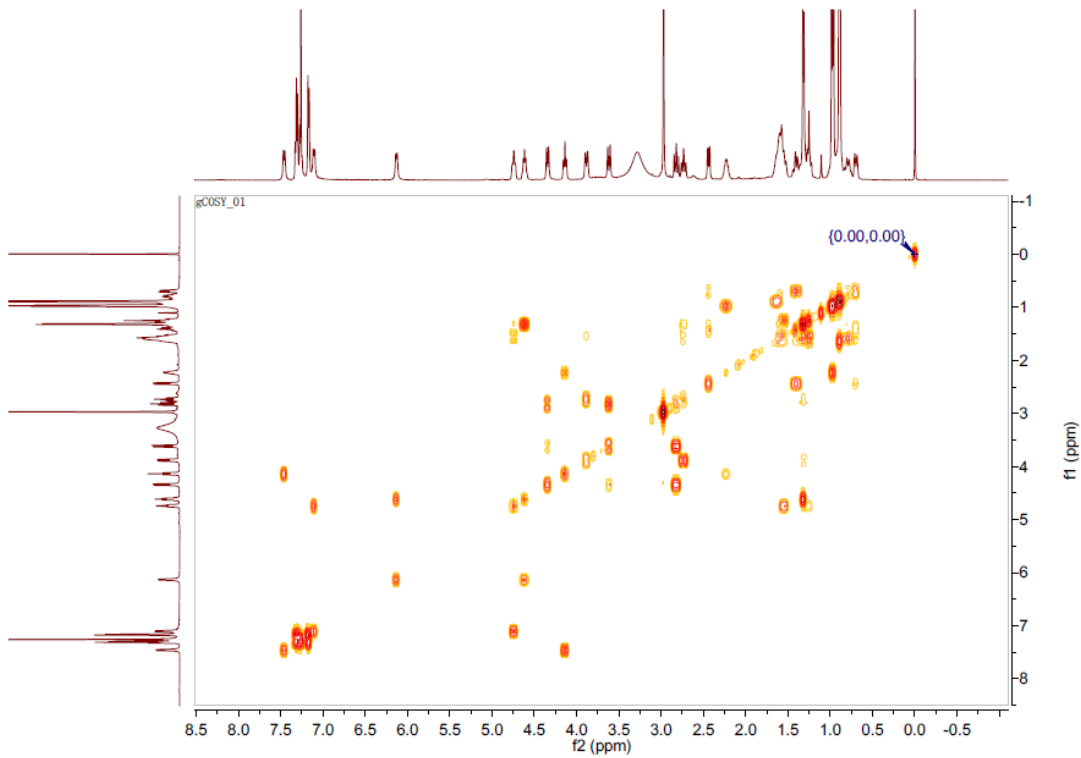

**Figure S4.**  $^1\text{H}$ - $^1\text{H}$  COSY ( $\text{CDCl}_3$ ) spectrum of compound **1**.

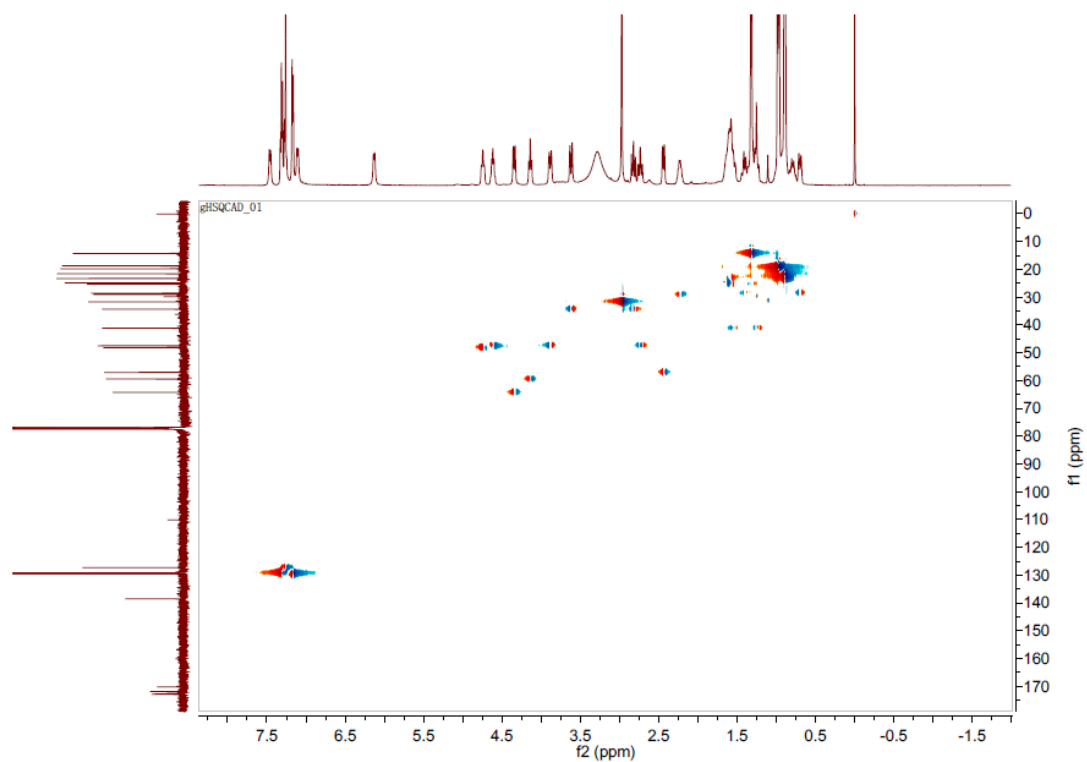

**Figure S5.** HSQC (CDCl<sub>3</sub>) spectrum of compound **1**.

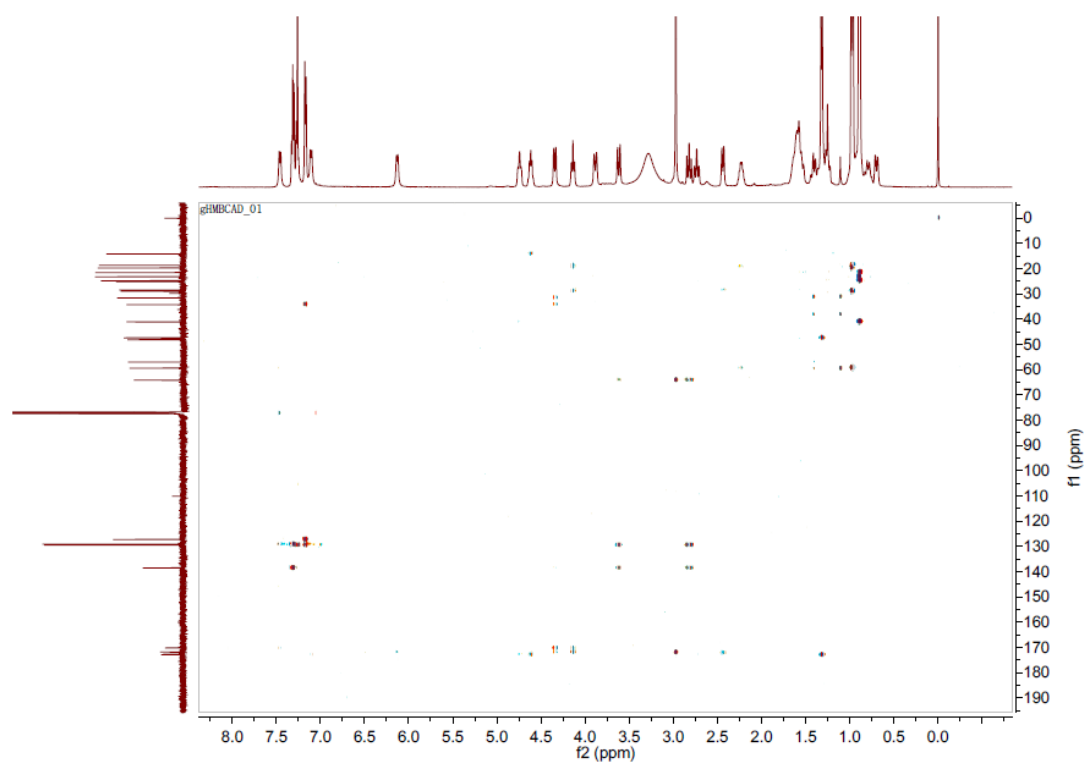

**Figure S6.** HMBC (CDCl<sub>3</sub>) spectrum of compound **1**.

20160112-CY23\_160112104831 #91 RT: 0.79 AV: 1 NL: 1.51E7  
T: FTMS + c ESI Full ms [150.00-2000.00]

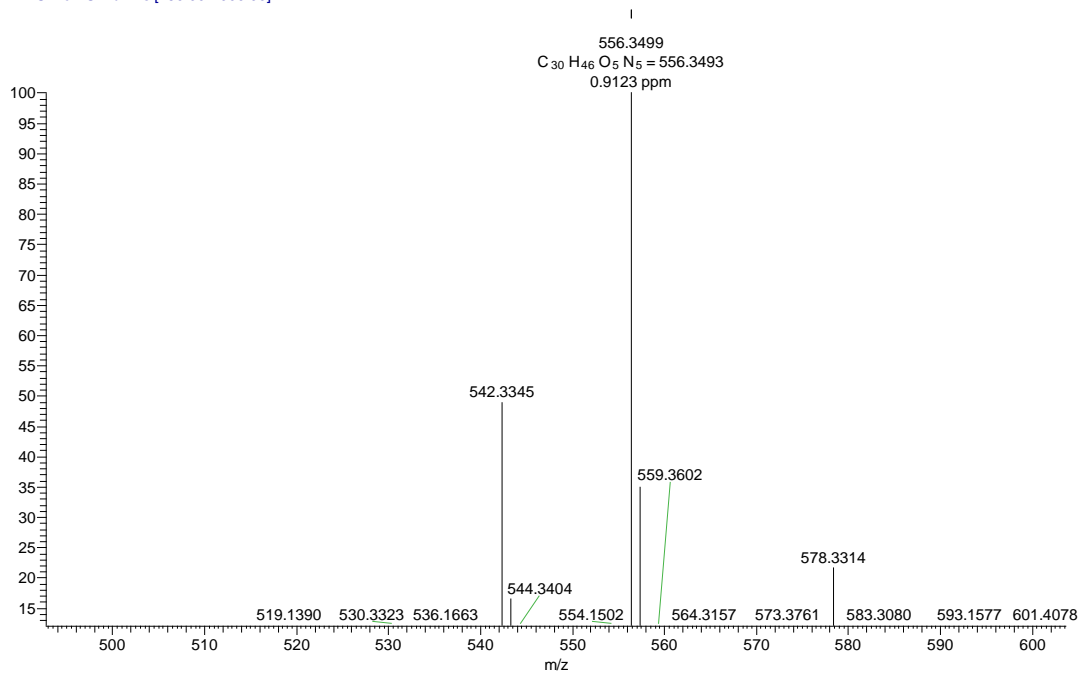

**Figure S7.** HRESIMS spectrum of compound **1**.

20160120-CY23\_160120102732 #206-252 RT: 1.67-2.32 AV: 47 NL: 1.66E6  
T: Average spectrum MS2 556.00 (206-252)

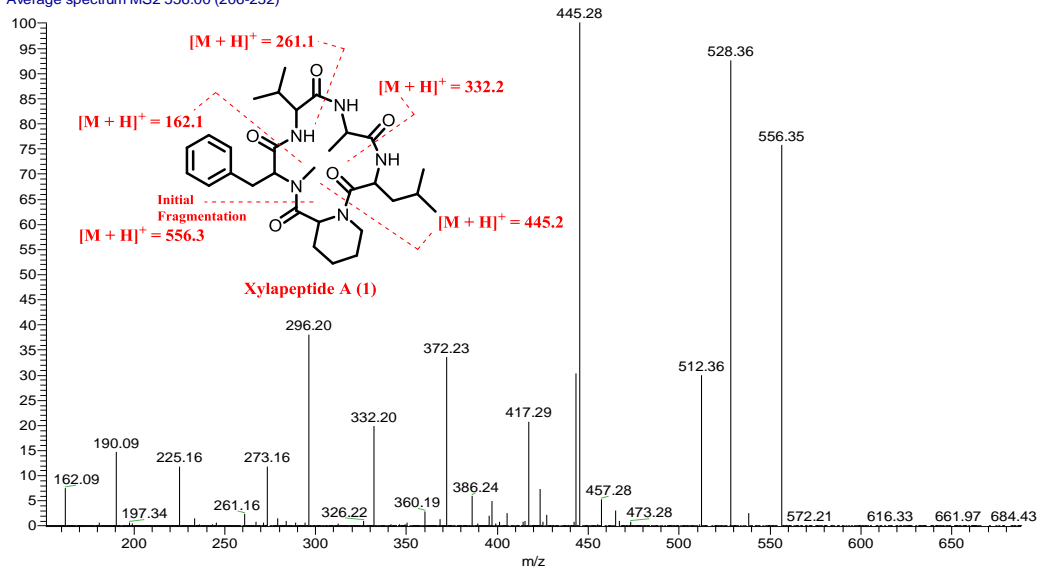

**Figure S8.** ESI MS<sup>2</sup> spectrum of compound **1**.

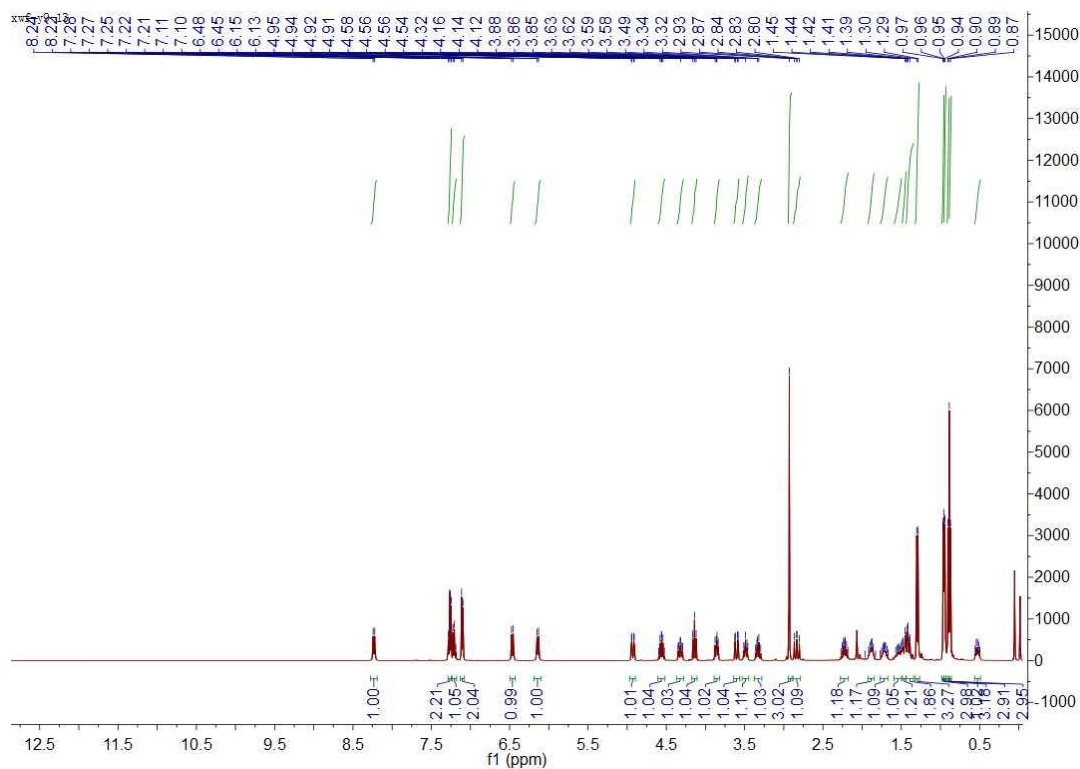

Figure S9.  $^1\text{H}$  NMR (400 MHz,  $\text{CDCl}_3$ ) spectrum of compound 2.

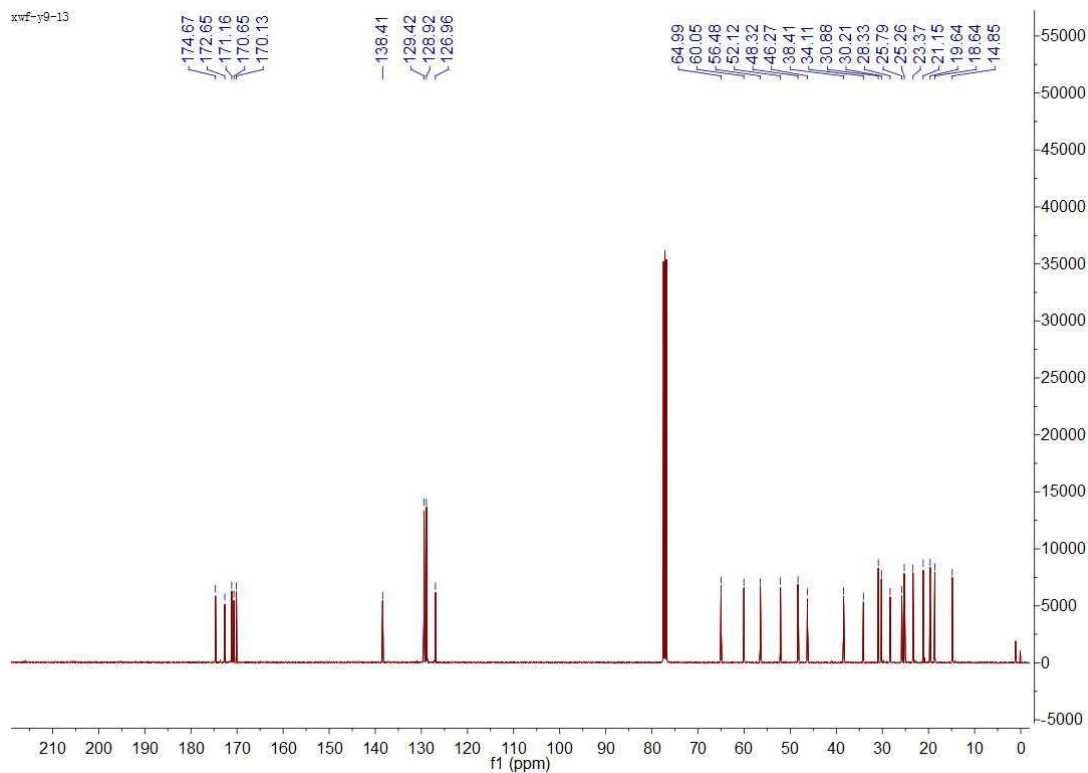

Figure S10.  $^{13}\text{C}$  NMR (100 MHz,  $\text{CDCl}_3$ ) spectrum of compound 2.

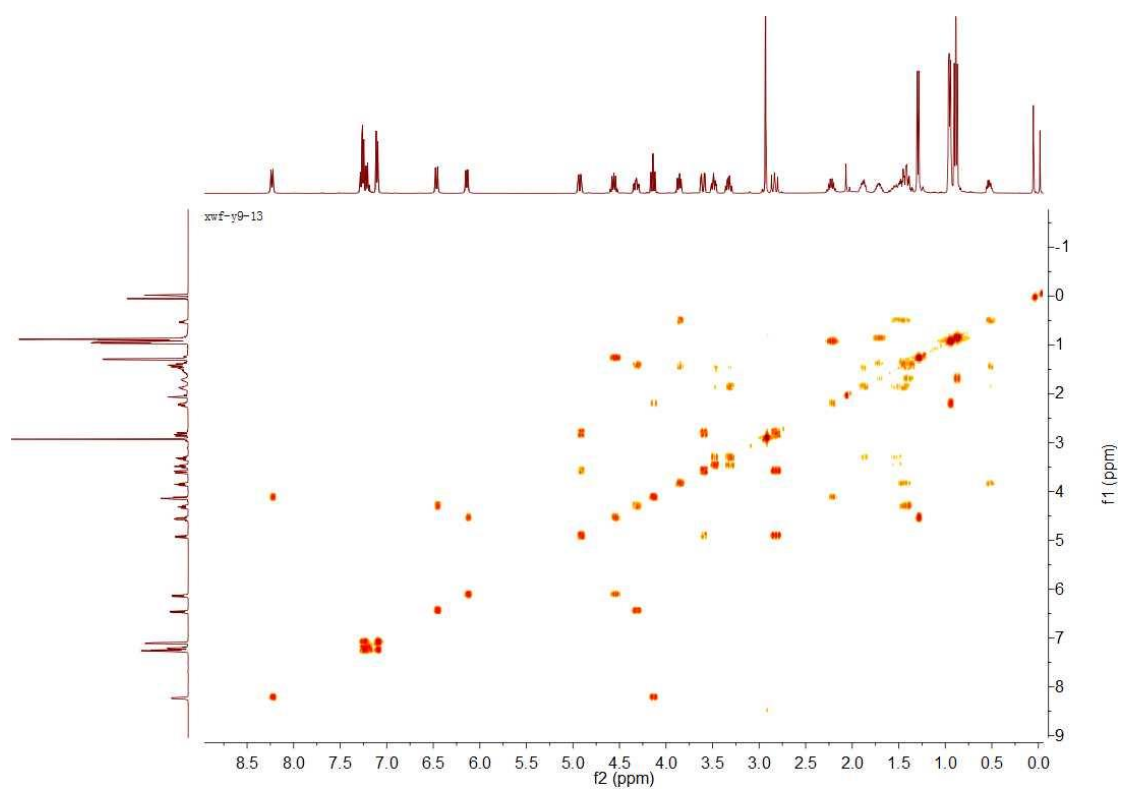

**Figure S11.**  $^1\text{H}$ - $^1\text{H}$  COSY ( $\text{CDCl}_3$ ) spectrum of compound **2**.

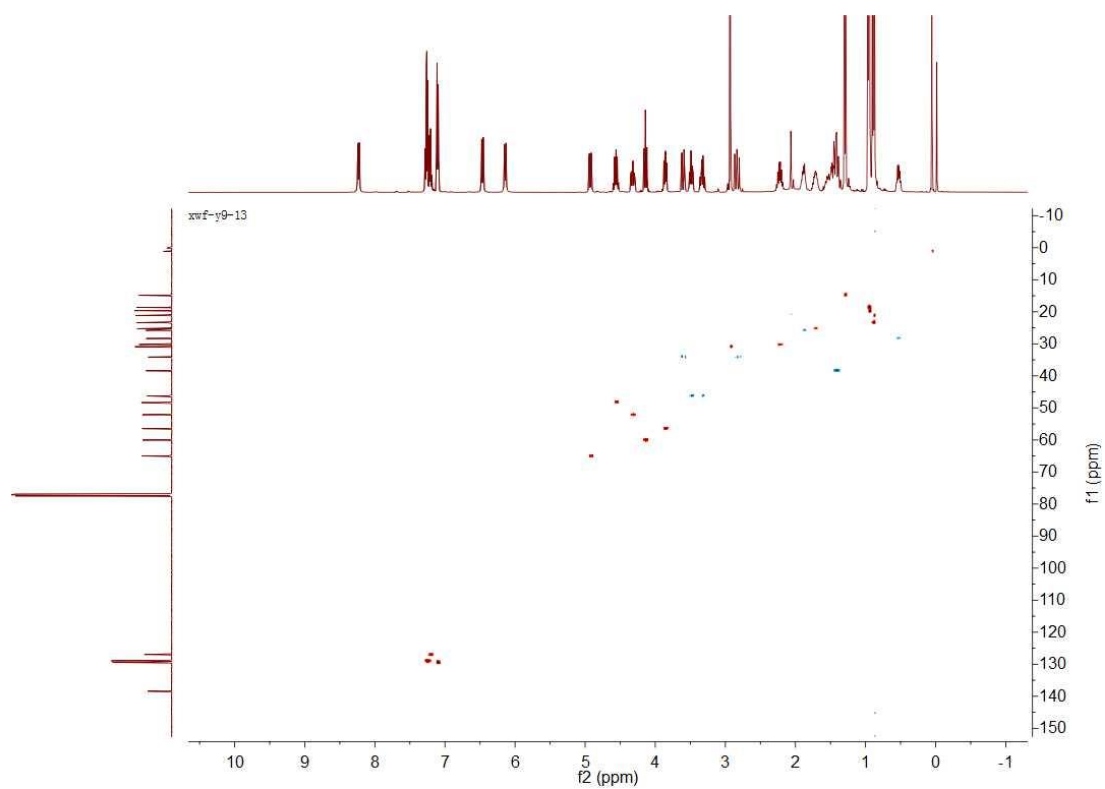

**Figure S12.** HSQC ( $\text{CDCl}_3$ ) spectrum of compound **2**.



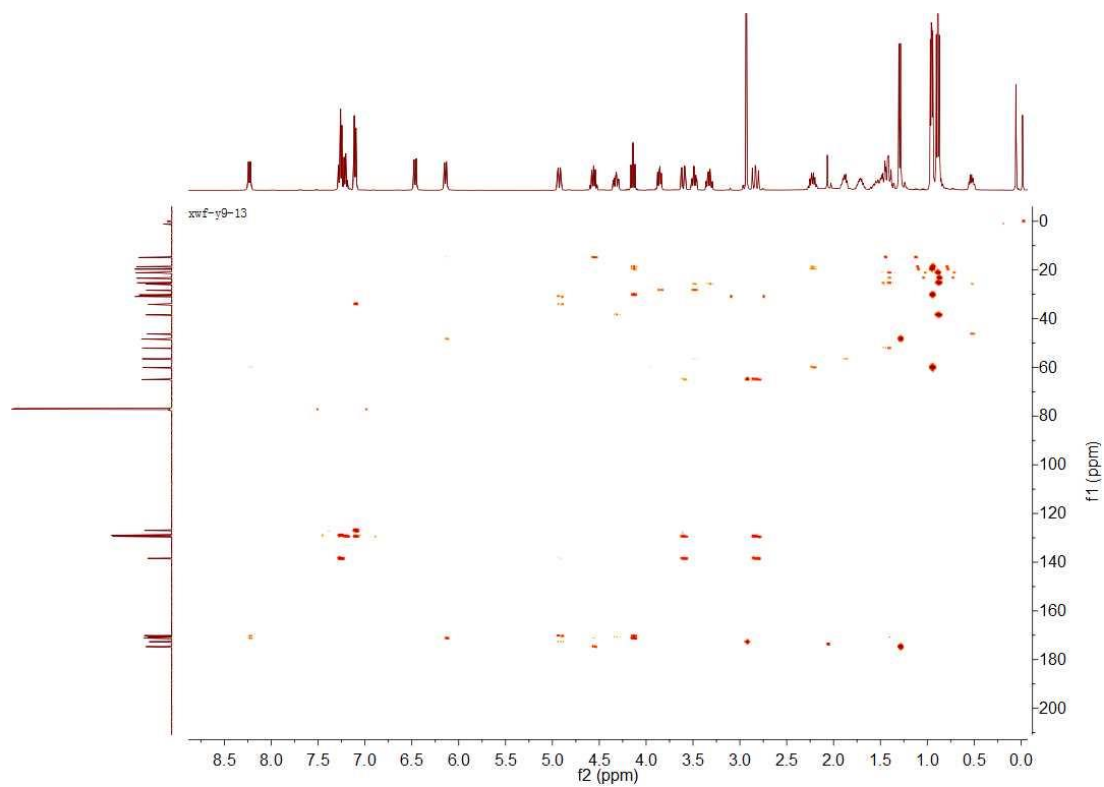

**Figure S13.** HMBC (CDCl<sub>3</sub>) spectrum of compound **2**.

20160112-Y9-13\_160112104831 #89 RT: 0.78 AV: 1 NL: 2.00E7  
T: FTMS + c ESI Full ms [150.00-2000.00]

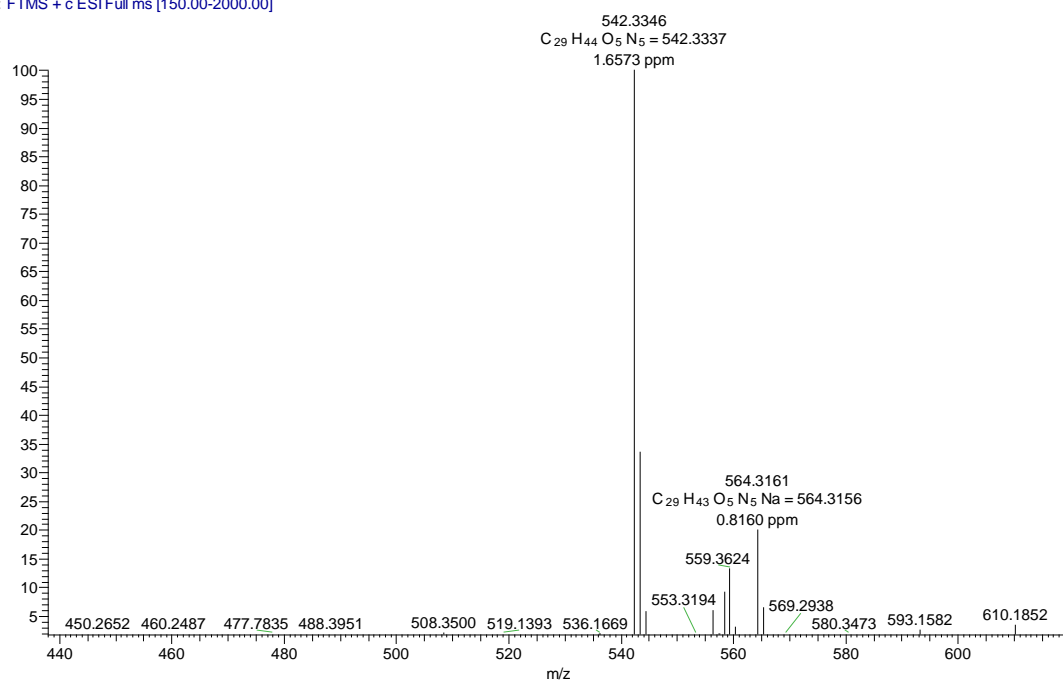

**Figure S14.** HRESIMS spectrum of compound **2**.

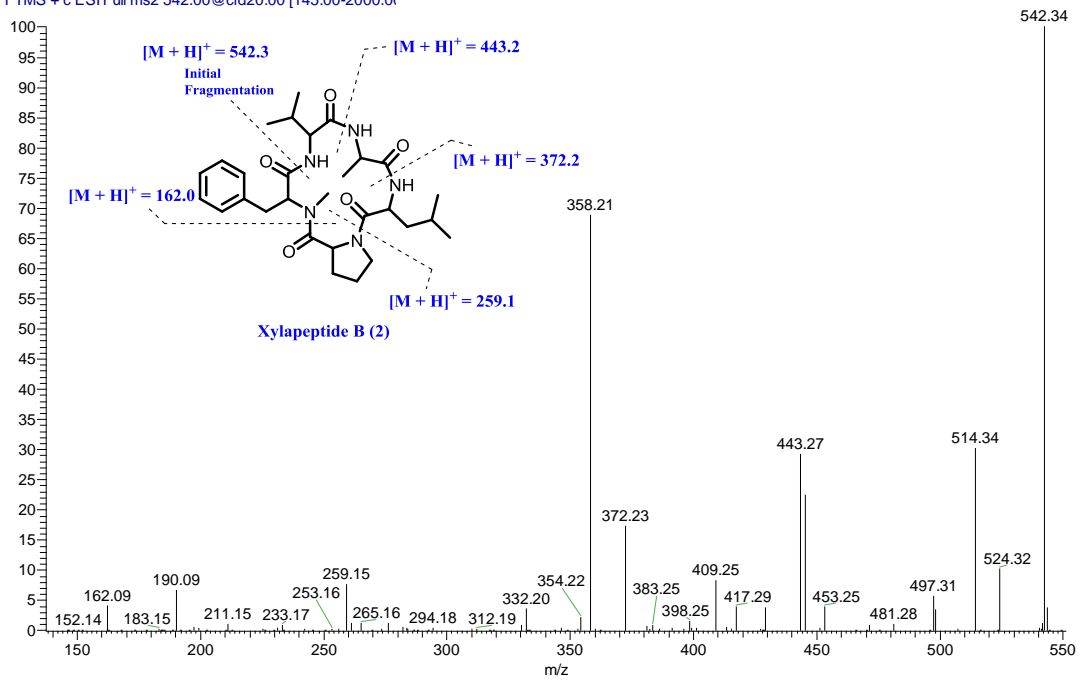

Figure S15. ESI MS<sup>2</sup> spectrum of compound 2.

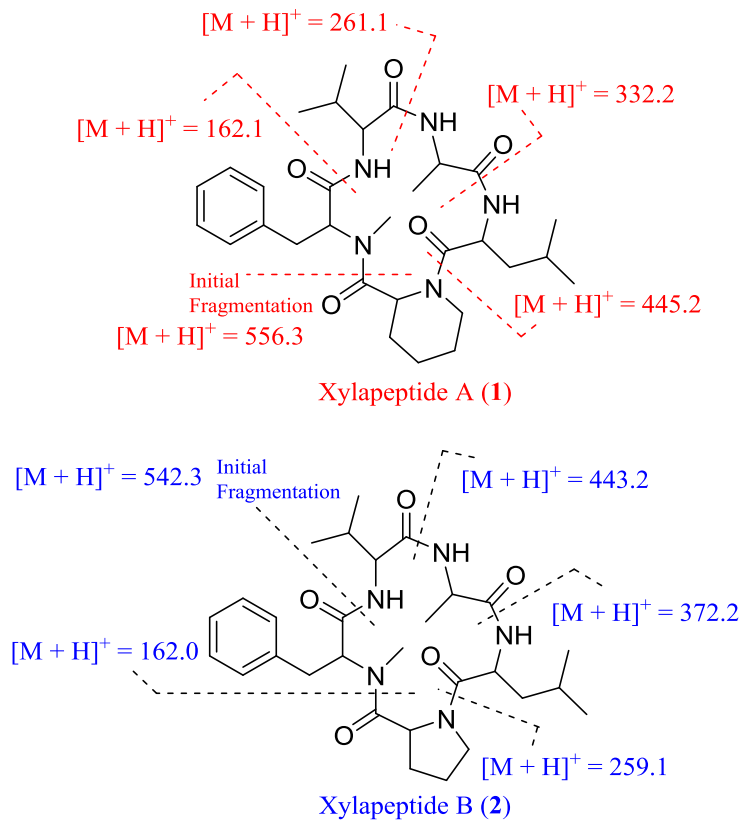

Figure S16. Assignments of ESI MS<sup>2</sup> fragmentation data for 1 and 2.

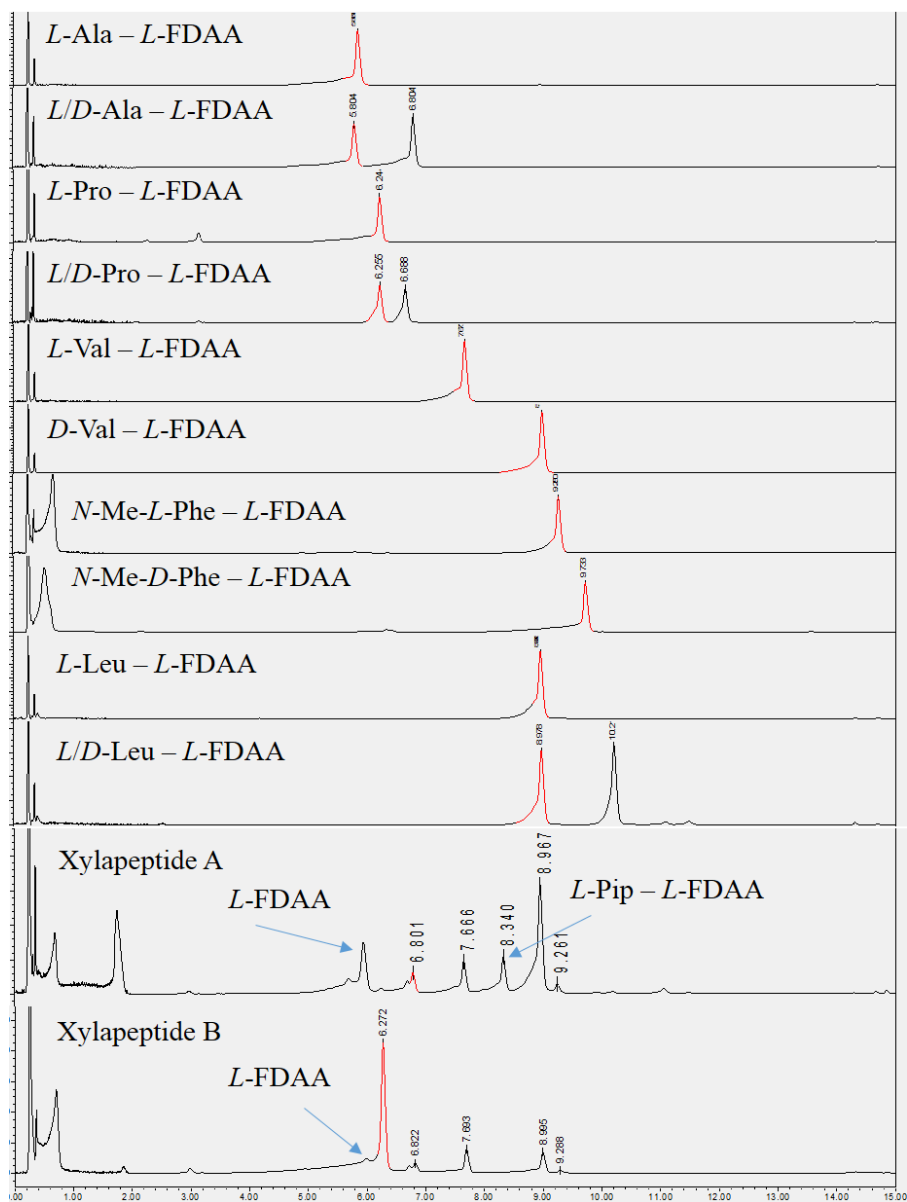

**Figure S17.** Marfey's analysis of the amino acids in **1** and **2** on UPLC-MS.
